# Supplementary material
Source: ML conference proceedings conference paper supplement (https://proceedings.neurips.cc/paper_files/paper/2014/hash/0942e5741531db4483d0cc9d6b83ace2-Abstract.html)
Supplement: Supplementary file [file 0942e5741531db4483d0cc9d6b83ace2-Supplemental.zip]

---

# Optimizing Energy Production Using Policy Search and Predictive State Representations – Appendix

---

## A Complementary Plots

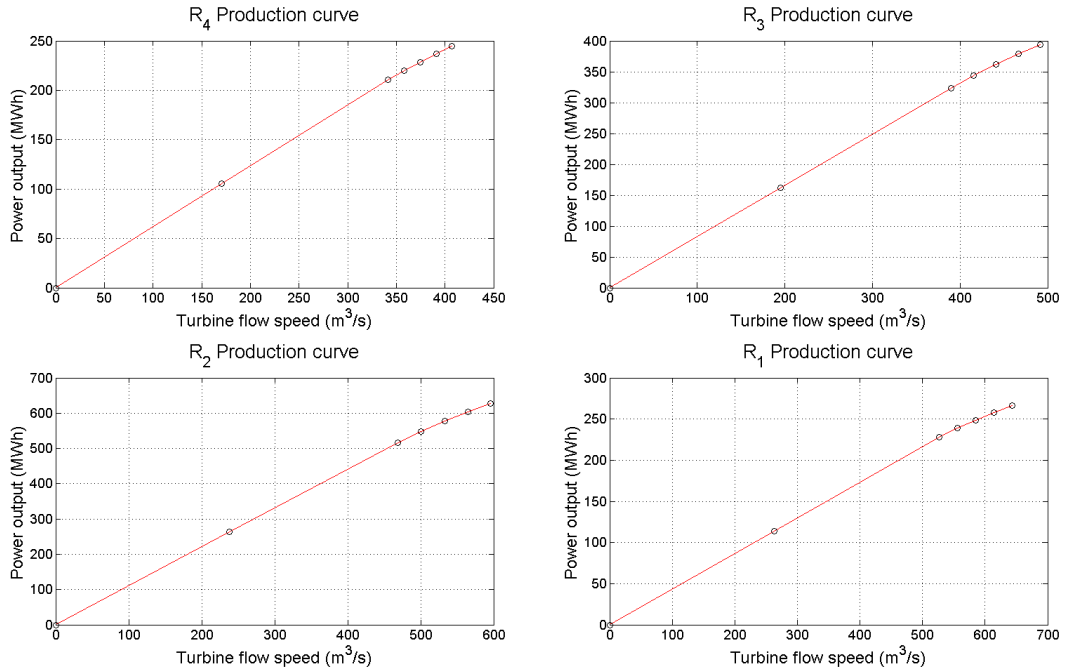

Figure A.1: Production functions of each site. For sites  $R_2, R_3$  and  $R_4$  the curves are given for some reference headwater of the corresponding reservoirs (shown in Fig. A.2). The largest  $x$  value on each curve represents the maximum total speed of the turbines.

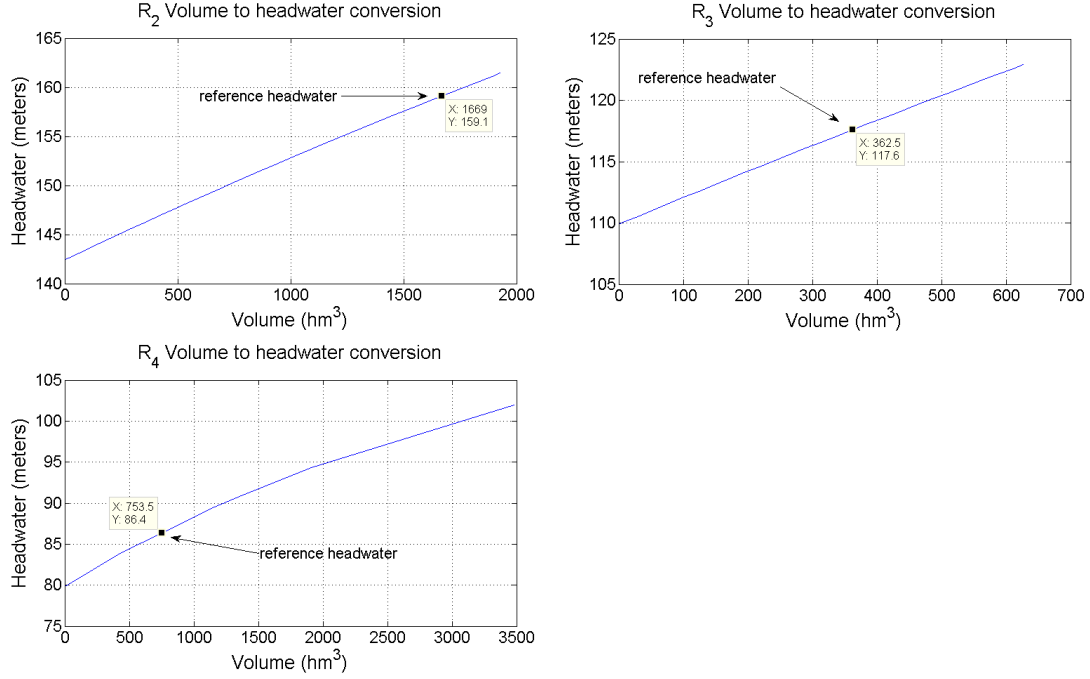

Figure A.2: Volume to level conversion tables for three reservoirs along with the reference points used to calculate the production curve baseline. Maximum capacities of reservoirs  $R_4$ ,  $R_3$  and  $R_2$  are  $3480 \text{ } hm^3$ ,  $626.4 \text{ } hm^3$  and  $1927 \text{ } hm^3$  correspondingly.

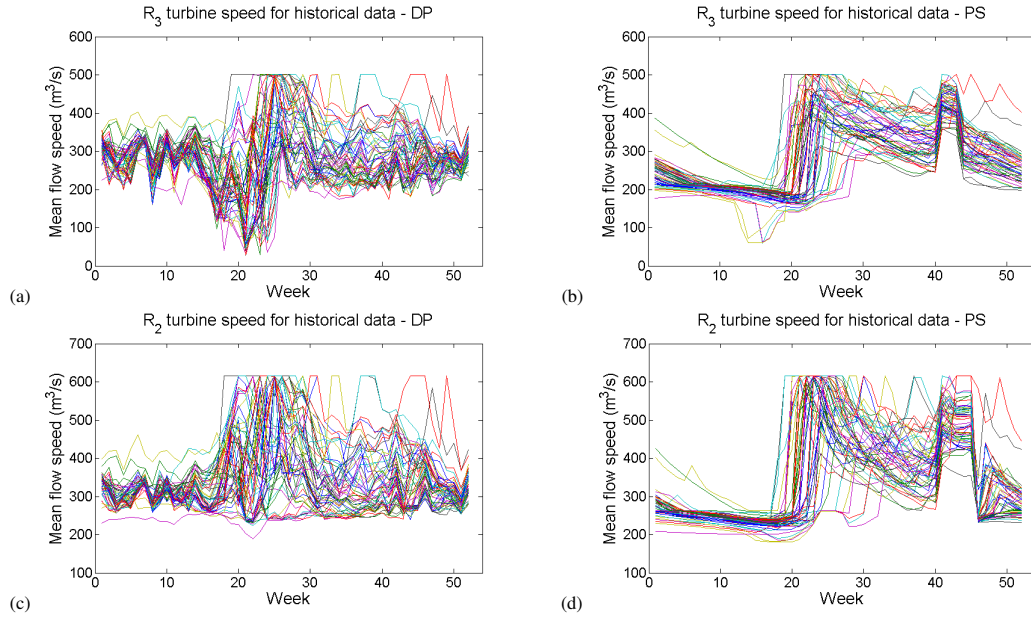

Figure A.3: Qualitative comparison between  $DP$  and  $PS$  with  $pred$  solutions evaluated on the historical data - a complementary figure to Fig. 3 in the paper. Left -  $DP$ , right -  $PS$  with  $pred$ . Plots (a)-(d) show the amount of water turbined at sites  $R_3$  and  $R_2$ .
